# Supplementary figures and images for: Mechanism of effective combination radio-immunotherapy against 9464D-GD2, an immunologically cold murine neuroblastoma
Source: PubMed Central journal article supplement — J Immunother Cancer. 2022 May 19;10(5):e004834. doi: 10.1136/jitc-2022-004834 (PMC9125770; doi:10.1136/jitc-2022-004834), 2022-05-19

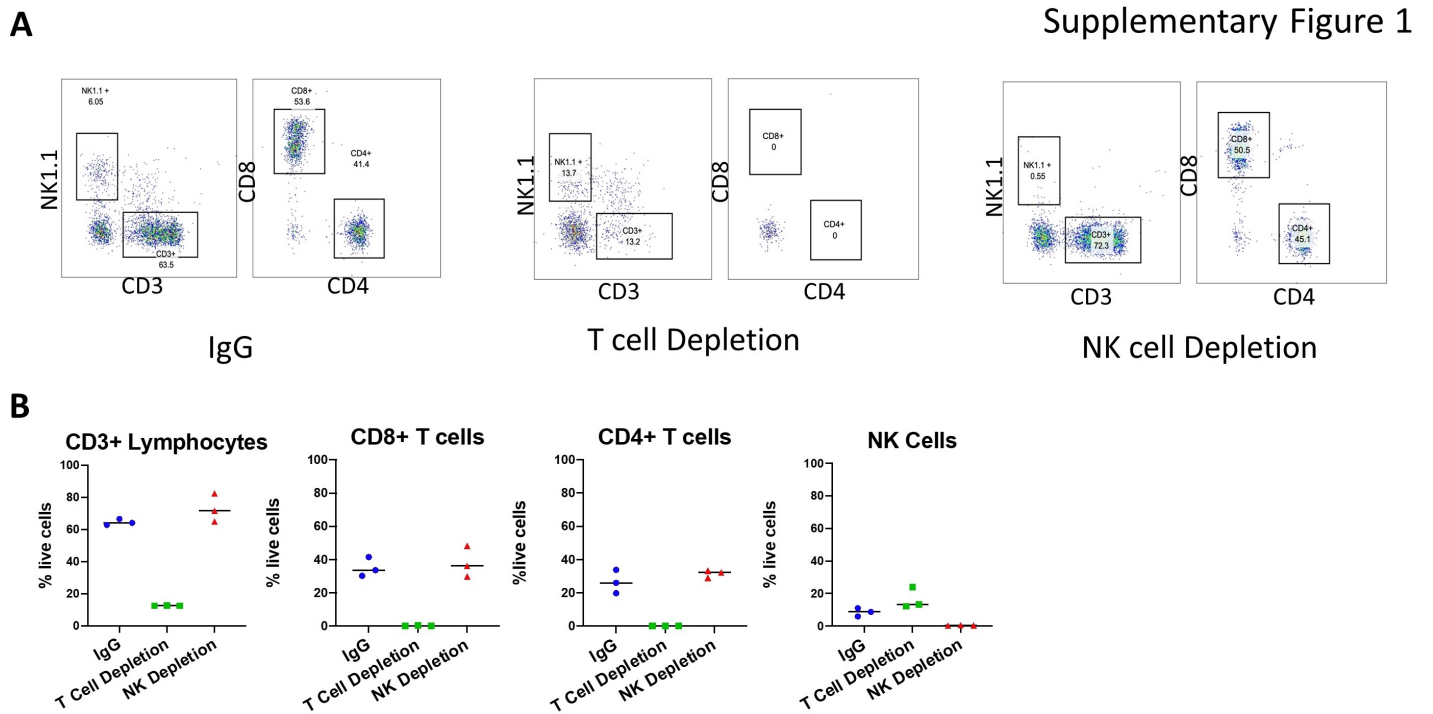

Supplement: jitc-2022-004834supp001.pdf [file jitc-2022-004834supp001.pdf]

Supplementary Figure 2

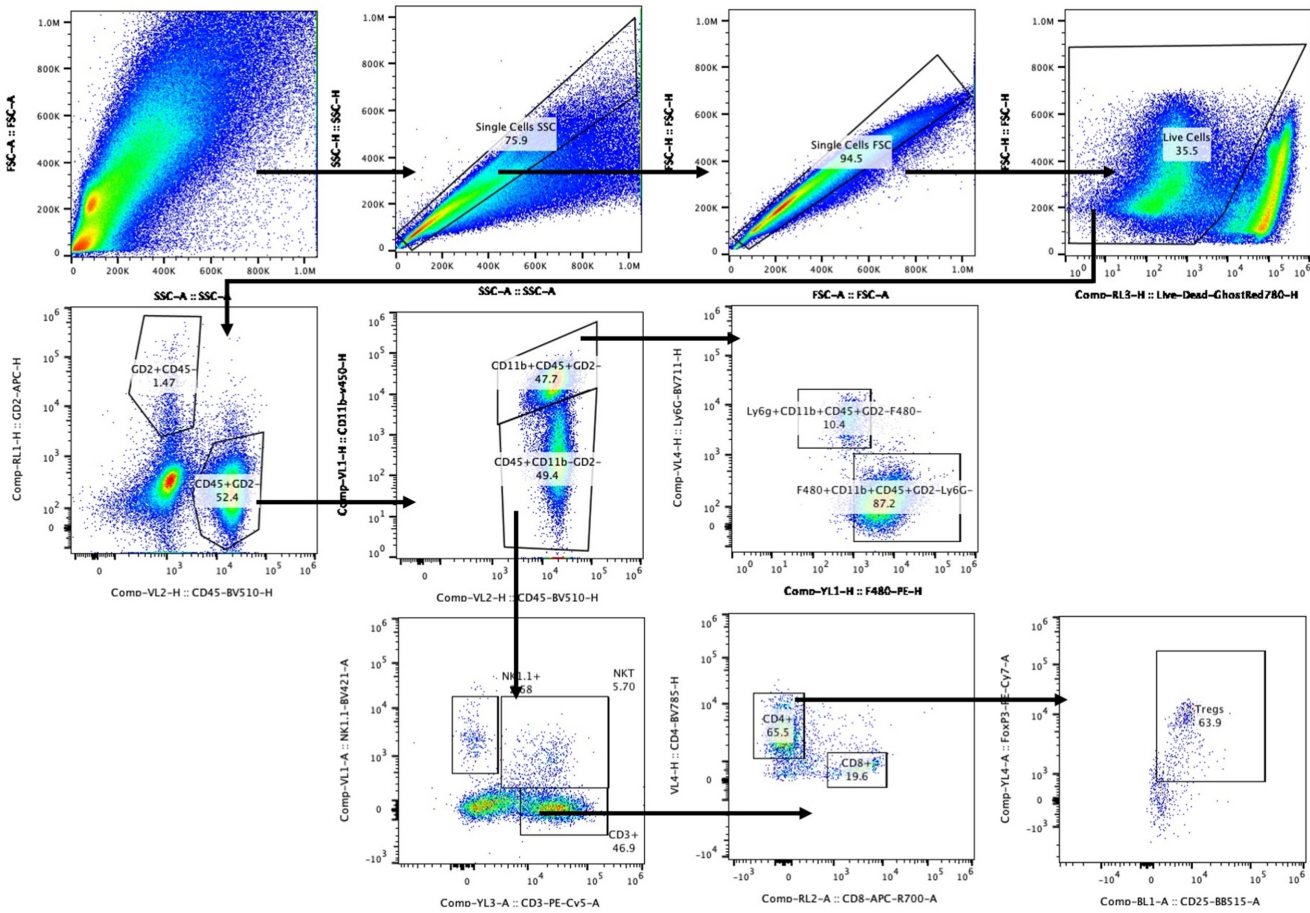

Supplement: jitc-2022-004834supp002.pdf [file jitc-2022-004834supp002.pdf]

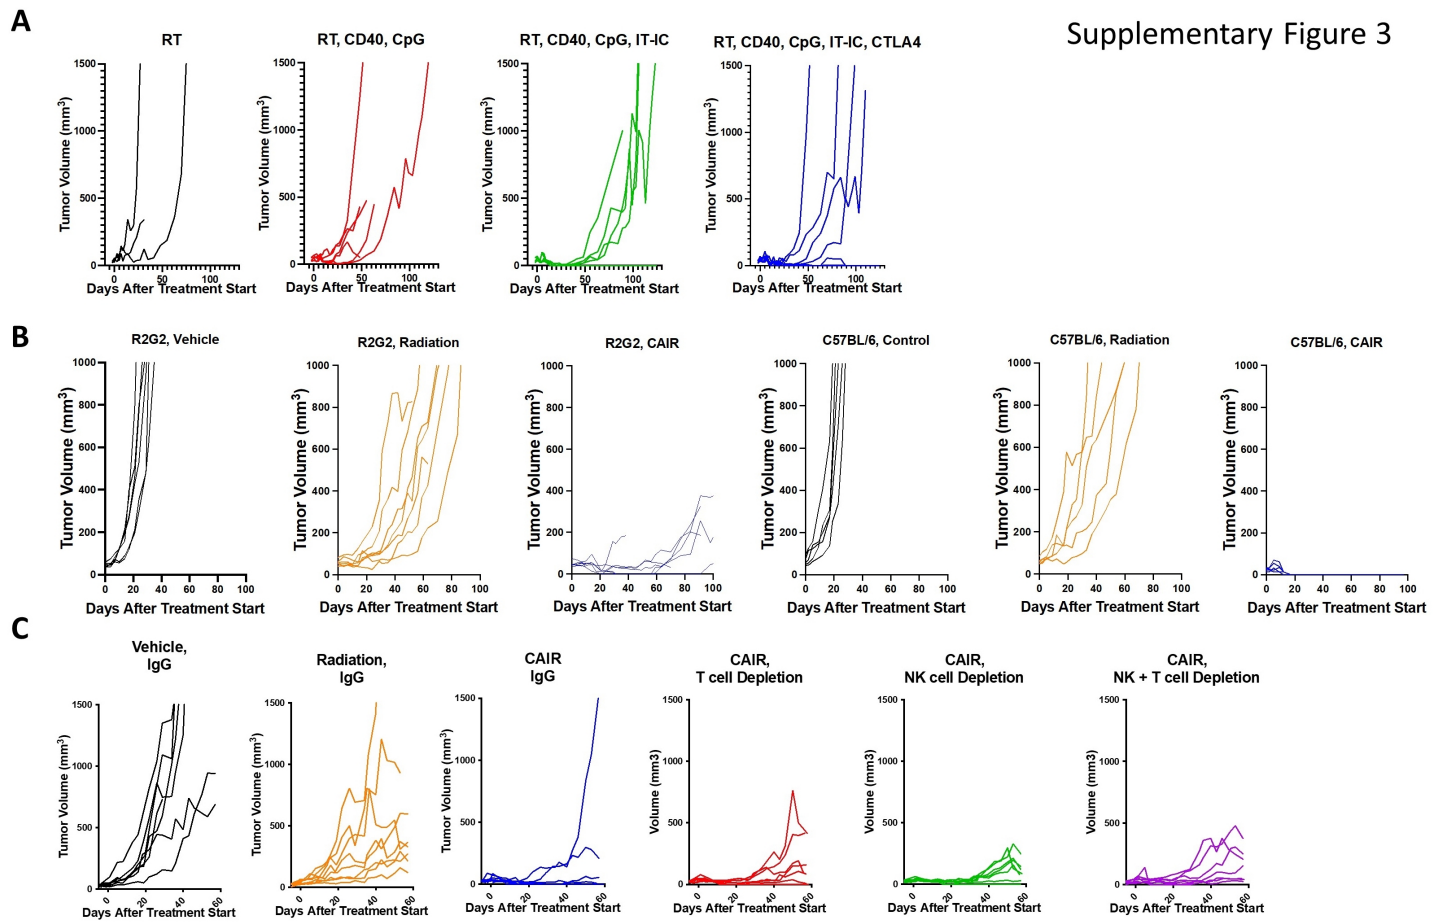

Supplementary Figure 3

Supplement: jitc-2022-004834supp003.pdf [file jitc-2022-004834supp003.pdf]

## Supplementary Figure 4

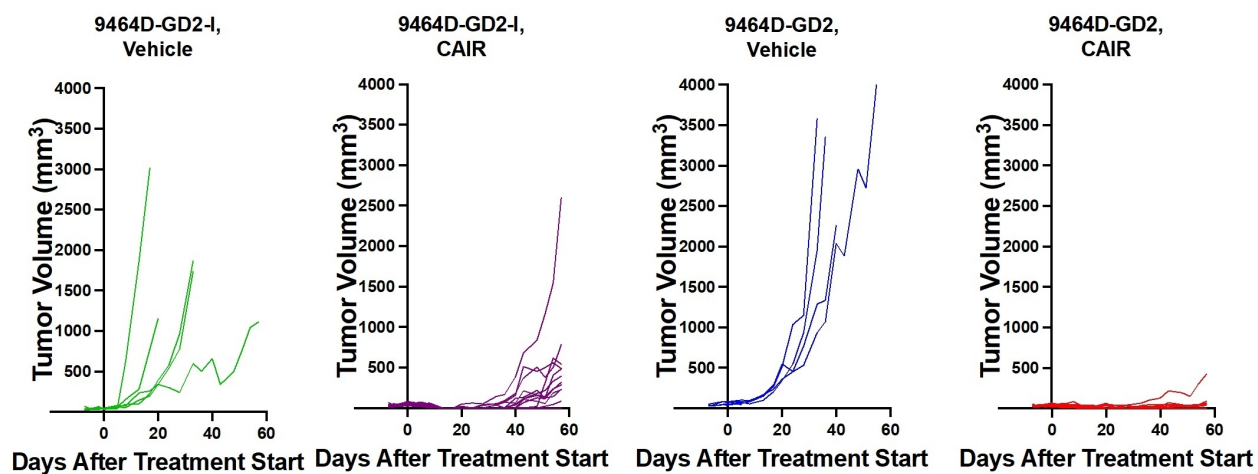

Supplement: jitc-2022-004834supp004.pdf [file jitc-2022-004834supp004.pdf]
